# Supplementary material for: Liver-Targeted Nanoparticles Facilitate the Bioavailability and Anti-HBV Efficacy of Baicalin In Vitro and In Vivo
Source: MDPI journal article supplement (doi:10.3390/biomedicines10040900), 2022-04-14
Supplement: s1 [file s1]

# Supplement Materials

## Results

|                                | Size (d.n...         | % Intensity: | St Dev (d.n... |
|--------------------------------|----------------------|--------------|----------------|
| <b>Z-Average (d.nm):</b> 104.1 | <b>Peak 1:</b> 139.7 | 100.0        | 60.61          |
| <b>Pdl:</b> 0.258              | <b>Peak 2:</b> 0.000 | 0.0          | 0.000          |
| <b>Intercept:</b> 0.928        | <b>Peak 3:</b> 0.000 | 0.0          | 0.000          |
| <b>Result quality</b> Good     |                      |              |                |

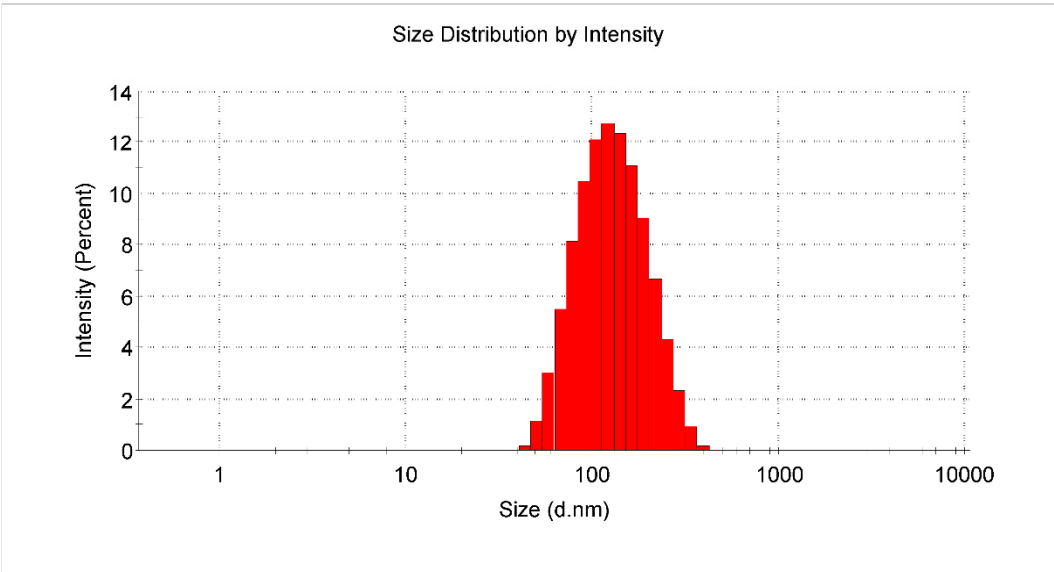

**Figure S1.** PDI and particle size of BAA1 were detected by the Malvern Zetasizer Nano ZS90.

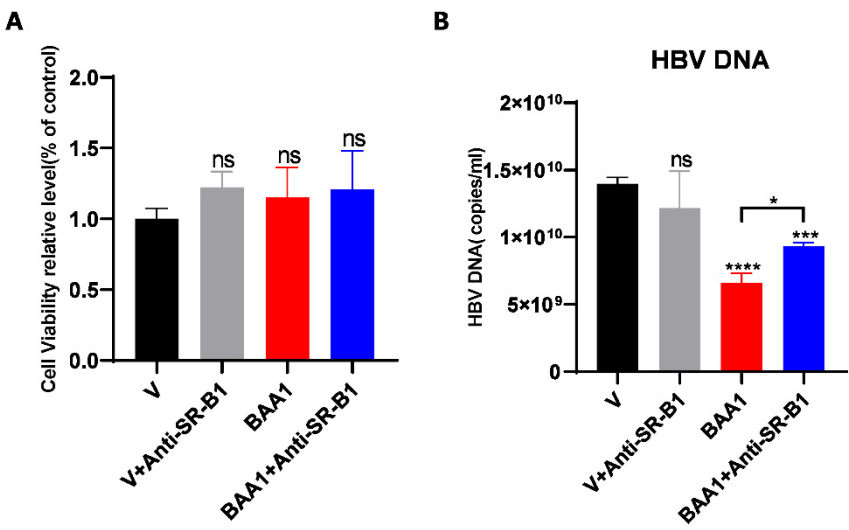

**Figure S2.** HepG2 cells were transfected with pHBV1.2 followed by treatment with BAA1 (50  $\mu$ M) or anti-SR-B1 (1:100, v/v) for 2 days. (A) The cell viability was

obtained according to the standard protocol of Cell Counting Kit-8 (Beyotime Biotechnology, Shanghai, China). (B) HBV DNA was detected by qRT-PCR. Data are mean  $\pm$  SD, n = 3; \*  $p < 0.05$ , \*\*\*  $p < 0.001$  and \*\*\*\*  $p < 0.0001$  vs. Control. ns, not significant.

**Table S1.** Primers used for qRT-PCR.

| Primer Name                    | Sequence (5' –3' ) |                          |
|--------------------------------|--------------------|--------------------------|
| HNF1 $\alpha$                  | Forward            | CCTGTCCCAACACCTCAACAA    |
|                                | Reverse            | TTGAAACGGTTCCTCCGC       |
| FOXA2                          | Forward            | AGGAGGAAAACGGGAAAGAA     |
|                                | Reverse            | CTGCAACAACAGCAATGGAG     |
| HNF4 $\alpha$                  | Forward            | GGAGCTGGCGGAGATGAGCC     |
|                                | Reverse            | CGCGAGTCATACTGGCGGTCTG   |
| pgRNA                          | Forward            | CTCAATCTCGGGAATCTCAATGT  |
|                                | Reverse            | TGGATAAAACCTAGCAGGCATAAT |
| Total HBV-specific transcripts | Forward            | ATCCTGCTGCTATGCCTCATCTT  |
|                                | Reverse            | ACAGTGGGGGAAAGCCCTACGAA  |
| HBV-DNA                        | Forward            | TCACCAGCACCATGCAAC       |
|                                | Reverse            | AAGCCACCCAAGGCACAG       |
| hB1F                           | Forward            | GGCTTATGTGCAAAATGGCAGATC |
|                                | Reverse            | GCTCACTCCAGCAGTTCTGAAG   |
| PS2                            | Forward            | CCAGGCCCAAGGAAGAAACAT    |
|                                | Reverse            | AACAGCAACCTCTCTCCGTG     |
| GAPDH                          | Forward            | CATGTTTCGTCATGGGGTGAACCA |
|                                | Reverse            | AGTGATGGCATGGACTGTGGTCAT |
